# Supplementary material for: A disease-associated frameshift mutation in caveolin-1 disrupts caveolae formation and function through introduction of a de novo ER retention signal
Source: PubMed Central journal article supplement — Mol Biol Cell. 2017 Nov 1;28(22):3095–111. doi: 10.1091/mbc.E17-06-0421 (PMC5662265; doi:10.1091/mbc.e17-06-0421), 2017-11-01

# Supplemental Materials

*Molecular Biology of the Cell*

Copeland et al.

# Supplemental Figure 1

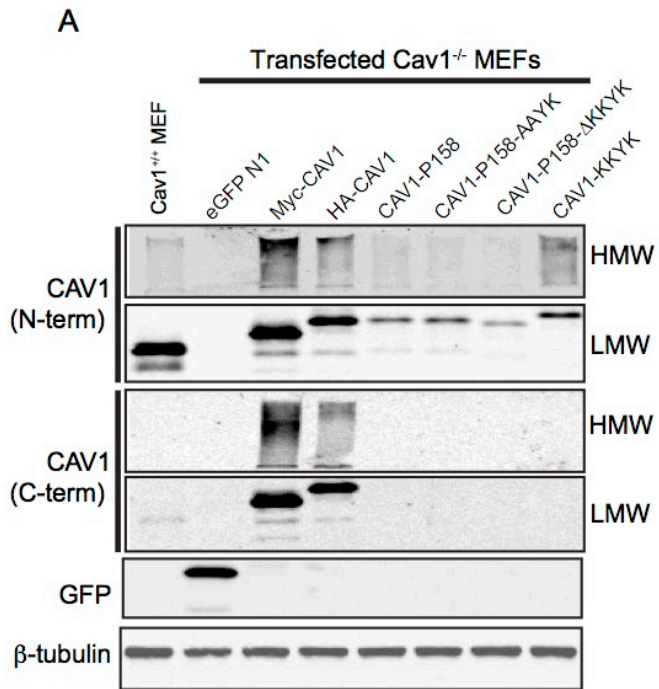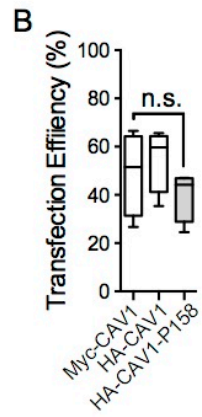

Figure S2

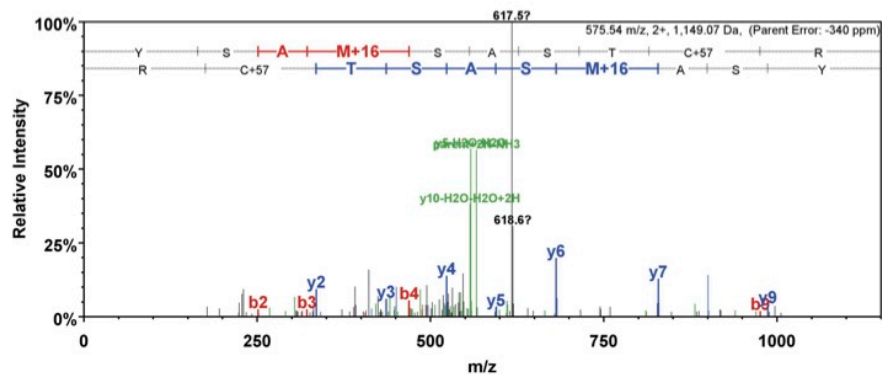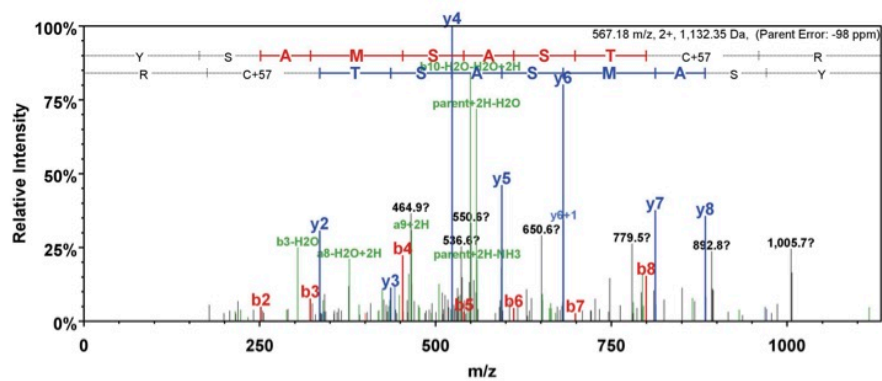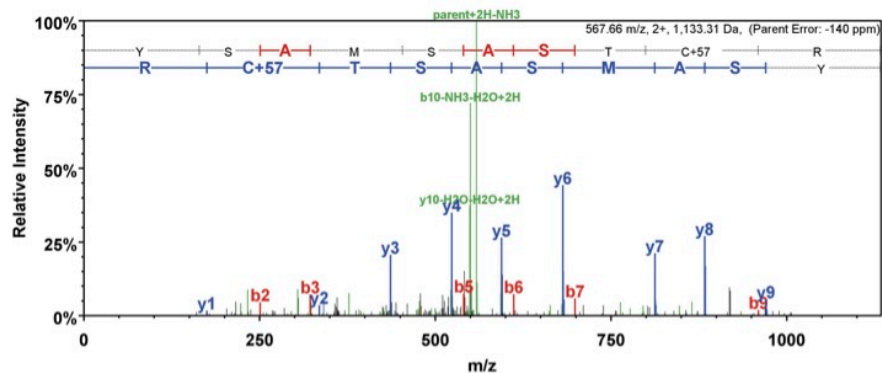

Supplement: supp_E17-06-0421v1_CombinedSupMats.pdf [file supp_E17-06-0421v1_CombinedSupMats.pdf]
